# Supplementary material for: Thalamus and claustrum control parallel layer 1 circuits in retrosplenial cortex
Source: eLife journal article supplement (doi:10.7554/elife.62207), 2021-06-25
Supplement: fig1-data1 [file figure1_sourcedata_age.xlsx]

## Sheet: Sheet1
[LR]	80	80	80	80	50	50	46	46	46	48	48	48	53	53	46	46	51	56	56	54	54	46	46	46	62	62	51	61	50	50	50	43	43	56	56	62	67	67	54	47	47	47	43	45	45	58	58	58	58
[L3 RS]	48	46	48	48	46	46	46	56	61	56	62	67	43	45	45	58	159	159	73	73	161	184	41	55	55	57	57	59	73	57	57	58	58	58	111	46	48	55	55	62	62	47	47	47	56	57	62	62	62
[L5 RS]	46	46	46	46	51	56	54	51	51	61	61	54	43	58	58	58	58	58	159	159	159	159	73	73	73	161	161	184	184	184	41	41	43	81	73	58	68	46	48	55	55	55
[truncated: 83 more columns]
