# Supplementary material for: Thalamus and claustrum control parallel layer 1 circuits in retrosplenial cortex
Source: eLife journal article supplement (doi:10.7554/elife.62207), 2021-06-25
Supplement: fig1-data1 [file figure1_sourcedata_Cin.xlsx]

## Sheet: Sheet1
[LR]	27.79	39.82	47.37	23.55	30.57	26.99	39.59	37.17	42.87	39.81	37.68	33.38	28.36	36.79	29.32	13.76	22.79	41.13	29.85	29.22	41.14	28.8	28.17	36.29	28.87	28.82	43.93	27.56	45.31	29.68	28.86	29.93	34.05	33.1	40.28	28.44	36.21	2.545	24.75	29.88	25.24	25.1	44.23	27.89	28.62	91.39	23.87	19.15	24.78
[L3 RS]	69.83	125.2	85.34	116.5	83.69	35.05	77.55	43.62	115.9	72.22	87.15	100.7	131	100.4	85.21	126.4	82.45	76.24	47	86.61	98.77	97.98	112.1	92.36	78.1	143.1	84.72	99.38	181.1	99.82	148.1	121.3	118.8	79.12	110.9	108.9	118.3	83.59	83.38	91.35	81.06	112.3	99.08	40.03	42.53	87.65	95.25	113	61.03
[L5 RS]	136.6	110.1	152	162.9	86.19	71.21	117.6	105	133.9	141.5	107.6	110.3	97.96	76.22	103.9	86.71	104.4	67.97	70.59	92.92	79.99	106.1	74.85	119.1	74.01	114.9	139.1	75.01	87.66	68.35	95.21	34.08	146.7	115	167.6	210.2	139.5
[truncated: 73 more columns]
