# Supplementary material for: Thalamus and claustrum control parallel layer 1 circuits in retrosplenial cortex
Source: eLife journal article supplement (doi:10.7554/elife.62207), 2021-06-25
Supplement: fig1-data1 [file figure1_sourcedata_firstSpikeLat.xlsx]

## Sheet: Sheet1
[LR]	834.4	614.7	715.9	435.5	700.9	469.2	111.1	307.2	309.8	847.7	230.1	187.3	188.4	240.2	714.5	300.4	269.3	344	326.5	430.6	375.8	125.1	924	486.5	378.1	221.4	160.7	517.1	628.3	830.1	941.5	326.7	307.1	666.2	983.4	939	606.3	846.6	365.8	526.8	722.1	553	188.2	871.4	598.4	611.4	63.75	773.7	567.5
[L3 RS]	104.8	95.6	63.33	867.5	187.4	170.7	103.4	219.6	72.1	186.5	353	654.9	211.1	177.8	932.3	243.8	106.1	258.6	177.6	115.8	172.3	746.6	79.22	155.2	117.5	220.1	939.7	100.8	429.3	140.9	127.9	63.68	142.6	87.78	61.38	426.8	918.5	135.9	295.7	170.3	321.7	134.5	151	278.5	176.6	125	109.8	194.2	211.9
[L5 RS]	262.3	103	121.9	227.9	93.68	91.08	123.5	116.6	141.3	243	212.6	129.2	311.2	74.43	64	19.45	106.7	167.3	70.8	221.9	86.53	375.1	854.2	81.03
[truncated: 55 more columns]
