# Supplementary material for: Thalamus and claustrum control parallel layer 1 circuits in retrosplenial cortex
Source: eLife journal article supplement (doi:10.7554/elife.62207), 2021-06-25
Supplement: fig1-data1 [file figure1_sourcedata_rheo.xlsx]

## Sheet: Sheet1
[LR]	116.5	35.36	55.52	55.54	70.72	35.16	25.29	80.79	40.44	65.59	70.5	50.57	35.11	55.62	55.45	45.61	24.93	35.54	41.94	55.54	55.51	19.83	36.55	12.85	14.92	13.77	45.51	35.17	34.58	52.5	10.89	39.91	45.6	31.87	32.67	20.6	37.71	44.83	29.99	29.68	16.98	35.72	25.5	40.34	34.76	35.58	418.4	24.74	40.54
[L3 RS]	126.2	131.7	121.2	106.1	80.81	40.45	136.1	116.2	95.33	80.54	115.9	70.82	14.89	45.55	91.23	65.54	60.58	80.4	247.1	75.46	70.56	343	211.6	80.66	171.6	55.65	65.8	116.1	40.66	45.57	45.63	85.47	35.62	100.6	110.2	30.62	60.69	19.87	40.72	65.56	45	40.73	60.64	86.2	71.2	206.3	105.9	125.9	45.53
[L5 RS]	70.68	121	55.7	70.43	216.5	125.9	125.9	30.66	85.61	55.6	55.72	86.12	78.7	262.5	307.8	201.6	91.11	40.67	63.97	171.8	278	75.59	101.1	136.1
[truncated: 55 more columns]
