# Supplementary material for: Thalamus and claustrum control parallel layer 1 circuits in retrosplenial cortex
Source: eLife journal article supplement (doi:10.7554/elife.62207), 2021-06-25
Supplement: fig1-data1 [file figure1_sourcedata_Rin.xlsx]

## Sheet: Sheet1
[LR]	490.4	143.3	181.5	324.5	303.1	387.5	362.6	294.2	200.9	202	337.7	441.8	348.9	383	413.3	437	638.4	208.3	434.4	455.8	256.1	486.9	341.8	225.9	398.5	290.9	195.8	307.5	224.5	290.7	467.3	384.5	273.5	309.7	274.2	542.7	377.8	516.5	813.3	286.3	366	456.4	357.7	350	369	183.9	671.4	977.2	556.9
[L3 RS]	197.6	98.85	148.7	66.65	97.38	192.5	128.2	162.9	86.2	132.7	86.33	209	86.35	80.27	142.1	130.2	169.2	177.2	348.3	184.6	154.1	110.8	151.8	218.7	176.3	58.96	237.2	156.5	40.22	179.2	53.81	83.71	65.88	159.6	133.2	81.85	152.9	240.5	164.9	106	207.6	78.79	110.2	407.2	540.4	215.5	214.2	177.9	335.4
[L5 RS]	99.32	93.79	42.61	54.85	247.7	76.18	74.12	74.95	114.7	60.27	99.52	123.3	103.1	216.5	179.6	194.2	157.4	124.7	214.5	208.6	126.5	175.3	179.4	157.2	265.8	154.2	94.55	160.7	178.2	293.8	219.1	209.6	75.39	81.96	88.9	62.87	62.23
[truncated: 73 more columns]
