# Supplementary material for: Thalamus and claustrum control parallel layer 1 circuits in retrosplenial cortex
Source: eLife journal article supplement (doi:10.7554/elife.62207), 2021-06-25
Supplement: fig1-data1 [file figure1_sourcedata_spikeAmp.xlsx]

## Sheet: Sheet1
[LR]	57.88	64.8	57.45	73.68	41.37	64.81	48.44	41.5	54.3	61.48	53.52	32.89	43.52	52.49	62.74	58.76	59.3	54.03	55.21	55.11	67.87	66.06	52.27	62.98	67.19	58.2	68.2	70.15	64.38	69.96	65.44	72.52	69.2	64.26	63.79	62.69	69.44	63.79	47.72	58.62	59.95	59.5	55.73	59.46	55.8	59.85	58.27	45.95	70.97
[L3 RS]	67.91	81.69	75.73	82.09	69.7	53.74	82.48	73.46	72.69	94.45	79.25	81.59	85.01	68.42	66.05	66.73	75.74	78.36	80.95	79.62	76.96	79.03	85.25	80.3	69.63	75.46	75.46	66.37	79.79	80.16	86.42	77.02	85.9	75.41	84.54	84.5	71.29	67.13	91.11	84.1	83.91	81.2	71.51	86.04	76.06	86.55	64.34	90.79	84.86
[L5 RS]	82.3	61.95	76.63	50.69	61.65	56.78	53.64	69.11	83.8	91.93	85.5	75.28	88.34	78.4	81.74	72.53	66.17	81.2	65.36	70.53	81.77	85.02	78.55	87.63	77.81	80.27	69.3	52.53	69.57	75.24	90.05	67.57	65.28	64.77	42.35	79.82	80.03	79.01
[truncated: 71 more columns]
