# Supplementary material for: Thalamus and claustrum control parallel layer 1 circuits in retrosplenial cortex
Source: eLife journal article supplement (doi:10.7554/elife.62207), 2021-06-25
Supplement: fig1-data1 [file figure1_sourcedata_spikewidth.xlsx]

## Sheet: Sheet1
[LR]	0.594	0.411	0.8511	0.9724	0.6197	0.488	0.5257	0.6141	0.3985	0.5376	0.6896	0.7054	0.5217	0.5254	0.5445	0.4552	0.5783	0.536	0.4005	0.5644	0.6732	0.7018	0.5625	0.5754	0.9079	0.4822	1.001	0.5759	0.6617	0.7202	0.7171	0.7066	0.8747	1.355	0.6279	0.8587	0.7786	0.6296	1.408	0.9718	0.6432	1.244	0.8742	1.235	1.131	1.068	1.038	1.529	0.7749
[L3 RS]	0.8526	0.9593	0.7622	0.6089	0.6392	0.7167	0.5255	0.5908	0.5455	0.7792	1.286	1.117	0.7441	0.7441	0.9061	1.078	1.47	1.371	1.717	1.064	1.431	1.398	1.502	1.885	0.8607	1.572	0.6957	0.5699	0.8398	0.4698	0.5995	0.5186	0.6446	0.7384	0.5169	0.9228	0.9029	0.7762	0.647	0.8138	0.6026	0.741	0.5975	0.9216	1.191	1.366	1.283	1.083	1.565
[L5 RS]	1.17	0.8574	0.7151	0.8631	2.191	0.7455	0.7319	0.6261	0.6239	1.077	0.5198	0.7852	1.083	1.167	1.101	1.233	1.236	0.9843	1.312	1.721	1.419	1.159	1.102	1.501	1.303	1.33	1.851	1.967	1.102	0.9142	0.6094	0.5991	0.5854	0.6328	0.517	0.8358	0.8395	0.5431
[truncated: 71 more columns]
