# Supplementary material for: Thalamus and claustrum control parallel layer 1 circuits in retrosplenial cortex
Source: eLife journal article supplement (doi:10.7554/elife.62207), 2021-06-25
Supplement: fig1-data1 [file figure1_sourcedata_tau.xlsx]

## Sheet: Sheet1
[LR]	13.63	5.706	8.597	7.644	9.265	10.46	14.35	10.93	8.613	8.042	12.72	14.74	9.895	14.09	12.12	6.011	14.55	8.567	12.97	13.32	10.53	14.02	9.629	8.197	11.5	8.383	8.602	8.476	10.17	8.626	13.49	11.51	9.313	10.25	11.04	15.44	13.68	1.314	20.13	8.555	9.237	11.45	15.82	9.76	10.56	16.8	16.02	18.71	13.8
[L3 RS]	13.8	12.37	12.69	7.765	8.149	6.748	9.943	7.107	9.993	9.586	7.523	21.05	11.31	8.056	12.11	16.46	13.95	13.51	16.37	15.99	15.22	10.86	17.02	20.2	13.77	8.438	20.1	15.56	7.286	17.89	7.972	10.16	7.826	12.62	14.77	8.915	18.09	20.1	13.75	9.686	16.83	8.851	10.91	16.3	22.98	18.89	20.4	20.11	20.47
[L5 RS]	13.57	10.33	6.475	8.933	21.35	5.424	8.717	7.869	15.37	8.53	10.71	13.6	10.1	16.5	18.66	16.84	16.43	8.475	15.14	19.38	10.12	18.59	13.43	18.72	19.67	17.72	13.15	12.05	15.62	20.09	20.86	7.142	11.06	9.426	14.9	13.21	8.682
[truncated: 73 more columns]
