# Supplementary material for: Thalamus and claustrum control parallel layer 1 circuits in retrosplenial cortex
Source: eLife journal article supplement (doi:10.7554/elife.62207), 2021-06-25
Supplement: fig1-data1 [file figure1_sourcedata_thresh.xlsx]

## Sheet: Sheet1
[LR]	-41.71	-45.23	-49.13	-45.36	-46.46	-39.26	-42.34	-39.6	-44.42	-43.67	-42.18	-42.37	-40.15	-36.11	-38.8	-31.79	-38.39	-36.77	-38.56	-33.35	-39.71	-40.72	-40.94	-50.04	-36.52	-40.02	-46.22	-40.46	-36.97	-43.97	-41.75	-36.56	-41.69	-40	-41.1	-40.36	-39.43	-46.93	-38.8	-32.47	-37.69	-34.57	-36.09	-35.35	-36.57	-44.2	-43.83	-32.16	-41.34
[L3 RS]	-41.33	-44.57	-39.57	-44.68	-44.08	-41.36	-42.01	-40.24	-39.25	-45.24	-32.26	-40.48	-38.76	-37.48	-46.03	-38.27	-40.41	-39.39	-32.95	-42.36	-42.25	-37.15	-39.74	-37.26	-36.53	-37.08	-41.48	-37.43	-39.4	-41.03	-46.27	-40.31	-38.73	-42.57	-43.45	-41.83	-40.42	-44.36	-49.48	-41.91	-43.01	-44.67	-41.61	-41.95	-42.18	-39.68	-36.92	-41.33	-37.54
[L5 RS]	-41.81	-38.39	-41.22	-38.01	-37.19	-38.46	-41.54	-34.97	-42.66	-37.97	-40.59	-40.35	-41.16	-39.06	-42.69	-34.36	-34.66	-41	-34.67	-35.4	-40.35	-42.05	-36.28	-47.92	-38.56	-38.53	-31.13	-27.45	-33.85	-43.5	-44.53	-40.95	-41.25	-35.98	-24.83	-43.34	-42.85	-43.95
[truncated: 71 more columns]
