# Supplementary material for: Thalamus and claustrum control parallel layer 1 circuits in retrosplenial cortex
Source: eLife. 2021 Jun 25;10:e62207. doi: 10.7554/eLife.62207 (PMC8233040; doi:10.7554/eLife.62207)
Supplement: Figure 2—source data 1. [file elife-62207-fig2-data1.xlsx]

## Sheet: Sheet1
panelG
LR (normalized responses)					RS (normalized responses)
L1a	L1/2	L3	L5sup	L5dp	L1a	L1/2	L3	L5sup	L5dp
5.22239	0				-0.164795	0	-0.164795
1.41297	0	1.75476			0.125122	0	0.375371
3.30607	0	1.7985			0.124012	0	0.068525
10.1165	0	3.31116			0.379389	0	-0.074768
-1.78528	0	-0.7843			3.16162	0
-1.39465	0	0.58289			0.703944	0
2.78626	0	0.35401			0.304845	0	-0.3
-0.37384	0	2.49786			-0.42	0	-0.49
8.53681	0	1.68457			-0.201416	0	-1.11084
17.1982	0	14.5391			-0.37842	0	-1.85801
0.79651	0	-1.16272			-0.390625	0	0.946045
-1.35549	0	-2.48464			-0.267029	0	-0.267029
3.95813	0	6.44226			0.124116	0	0.044116
0.29704	0				-0.040054	0	-0.180054
0.43324	0				-0.06	0	0.86465
-1.8476	0	-8.59981			1.02743	0	0.198364	0	0
3.65601	0				0	0	0.116984	0
-5.17426	0	2.36511			0.415039	0	0	0	0
-0.73131	0	2.21779			0.09	0	0	0	0.615047
5.76783	0	0.219725			-0.303905	0	1.33896	0.133514	-0.19455
5.64575	0				-0.431606	0	0.754224	0.034877	-0.295972
11.4929	0	7.84914			-0.332642	0	0.497436	-0.332642	-0.332642
-2.72217	0	7.87963			0.330607	0	0.67066	0.101725	0.478835
-0.70902	0				0.183105	0	-0.325521	0.025431	-0.223796
0.77675	0	3.44486			0.394694	0	-0.195313	-0.195313	-0.195313
4.1687	0	6.91354			-0.68461	0	0.50557	-1.82597	-1.82597
-0.29602	0	3.91846			0.330353	0	-0.139618	-0.514984	-0.514984
0.331334	0	0.579834
0.476072	0	-0.482178
0.96433	0	-1.66016
1.44653	0	0
1.62964	0	-1.69678
2.89307	0	1.04981
1.61438	0	0.220066
4.039	0	-0.044253
-0.454711	0	6.65588
4.66309	0	2.31323
1.44043	0	2.83205
0.21972	0	0.01831
1.11186	0	-1.2441
5.3223	0	8.197
	0	6.39039
7.46457	0	-3.4729
5.7312	0	-1.51825
5.05451	0	4.84311	5.60611
-1.08643	0	3.58276	-1.08643
3.19519	0	0
1.01471	0	1.57674	4.19399	0
1.36312	0	-3.10771
17.8375	0	2.91443	0	0
1.36108	0	0	0	0
0.26245	0	0.28686
-0.994001	0	-0.994001	-0.994001	-0.994001
0.88501	0	0	0	0
6.53731	0	5.78091	-0.832694	-0.832694
2.65503	0	19.4092	-2.14844	-2.14844
0.60526	0	12.619	-8.11768	-8.11768
3.72751	0	8.88497	-2.83813	-2.83813
3.85568	0	-2.34375	-4.08325	-3.9917
