# Supplementary material for: Thalamus and claustrum control parallel layer 1 circuits in retrosplenial cortex
Source: eLife. 2021 Jun 25;10:e62207. doi: 10.7554/eLife.62207 (PMC8233040; doi:10.7554/eLife.62207)
Supplement: Figure 3—source data 1. [file elife-62207-fig3-data1.xlsx]

## Sheet: Sheet1
panelG
LR (normalized responses)					RS (normalized responses)
L1a	L1/2	L3	L5sup	L5dp	L1a	L1/2	L3	L5sup	L5dp
0	0	0			0	2.29492
0	-0.250244	-0.250244			0	0.227708	0.349778
0	0	0			0	-0.02746	1.41297
					0	0.483704	0.811768
0	0	0			0	0.27771	0
0	0	0			0	0.247192	0.531006
0	0	0			0	-0.24414	-3.85742	1.20239
0	0				0	0	0.308228
					0	0	0.286865
0	1.37329	1.87988	0		0	0.213623	0.614929
0	0	0	0
0	0	0			0	0.613403	1.3031	1.3916	0.88501
0	0	0	0		0	0.933838	2.40217	2.92358	0.3479
0	0	0
					0	0.534784	0.242687	0.676473	-0.132243
0	0	0			0	3.28369	6.52364	4.52271	3.52783
0	0	0			0	1.06812	0.920614	0.747681	0.463867
0	0	0			0	0.439453	0	0	0
0	0	0			0	0.811768	0.427246	0.256348	0.579834
0	0	0.135942	0	0	0	0.161307	0.244141	0.10376	0
0	0	0	0	0
0	0	0	0	0
0	-0.078791	-0.018311
0	0	0	0	0
0	0	0	0	0
0	-0.106267	0.165667	-0.113896	-0.75858
0	0	0	0	0.10376
