# Supplementary material for: Thalamus and claustrum control parallel layer 1 circuits in retrosplenial cortex
Source: eLife. 2021 Jun 25;10:e62207. doi: 10.7554/eLife.62207 (PMC8233040; doi:10.7554/eLife.62207)
Supplement: Figure 4—source data 1. [file elife-62207-fig4-data1.xlsx]

## Sheet: Sheet1
panelG
LR (normalized responses)					RS (normalized responses)
L1a	L1/2	L3	L5sup	L5dp	L1a	L1/2	L3	L5sup	L5dp
0	0	0			0	0.033569	-0.048829	-0.231934	-0.231934
0	0	0			0	1.42415	0.915527	0.817871	0
0	0	0			0	1.13424	1.26866
0	0.255039	0.177002			0	0.372314	0.149536	0.848389	0.71106
0	0.30899	0.507355			0	1.07829	0	0.178019	0.20752
0	0	0			0	0.988187	1.42924	1.14611	3.30607
0	0	0	0	0	0	1.69881	0.951129	-0.132243	0.013079
0	0.378418	0.131226	0.164795	0	0	0.956217	1.2425	0.34078	0.940959
0	0	0	0	0	0	0.62561	0.58492	0.20752	0
0	-0.7	-0.19864	0.032422	-0.449756	0	0.671387	0.339508	0.50354	0.305176
0	0.0755306	-0.0953674	-0.0953674	-0.0953674	0	1.85648	0.66121
0	1.17493	0.686646	0.483195	0.244141	0	1.22681	0.813802	0	0.134277
0	0.24414	-0.101725	-0.146485	-0.042725	0	0.106811	0.318254	-0.320435
0	-0.085739	-0.675746	-0.435965	0.171117	0	0.482178	0
0	0.597632	0.825502	0.587462	-0.363668
0	0.488281	0.226702	0	0
0	0	0	0.131226	0
0	-0.354004	-0.354004	-0.069173	-0.244141
0	0.461397	0.313169	0.310262	0.457764
