# Supplementary material for: Thalamus and claustrum control parallel layer 1 circuits in retrosplenial cortex
Source: eLife. 2021 Jun 25;10:e62207. doi: 10.7554/eLife.62207 (PMC8233040; doi:10.7554/eLife.62207)
Supplement: Figure 5—source data 1. [file elife-62207-fig5-data1.xlsx]

## Sheet: Sheet1
panelG
LR (normalized responses)					RS (normalized responses)
L1a	L1/2	L3	L5sup	L5dp	L1a	L1/2	L3	L5sup	L5dp
0	0.377586	0.705141	0.413375	-0.2053	0	-0.187822	-0.265503	-0.110141	-0.265503
0	0.286102	0.023651	0.326793	-0.097063	0	0	0	0	0
0	0.308228	0.280762	0.146484	0	0	0.231933	0.140381	0.01831	-0.317383
0	0.903316	0.247193	-0.250244		0	0.006104	-0.39978	-0.39978	-0.39978
0	0.231934	0.00627	0.369263	0.03357	0	0	0	0	0
0	1.63269	1.16984	0.222342	0.445557	0	0	0	0	0
0	0.47684	0.56763	-1.0732	-1.35803	0	0	0	0	0
0	0.283378	0.909424	0	0.0793457
