# Supplementary material for: Thalamus and claustrum control parallel layer 1 circuits in retrosplenial cortex
Source: eLife. 2021 Jun 25;10:e62207. doi: 10.7554/eLife.62207 (PMC8233040; doi:10.7554/eLife.62207)
Supplement: Figure 7—source data 1. [file elife-62207-fig7-data1.xlsx]

## Sheet: Sheet1
ADAV (LR normalized responses)
	cell 1	cell 2	cell 3	cell 4	cell 5	cell 6	cell 7	cell 8	cell 9
pulse 1	1	1	1	1	1	1	1	1	1
pulse 2	0.949276	0.545455	0.771062	0.822653	0.85408	0.85665	0.633368	0.162579	1.12756
pulse 3	0.775362	0.39394	0.543345	0.701286	0.76891	0.711123	0.61444	0.212534	1.28235
pulse 4	0.731884	0.272727	0.465202	0.690599	0.771292	0.648487	0.679986	0.16712	1.0427
pulse 5	0.463768	0.398269	0.3779	0.673078	0.576533	0.636645	0.62741	0.222525	0.870237
pulse 6	0.594203	0.324676	0.462759	0.612822	0.702204	0.680895	0.592008	0.250681	0.842445
pulse 7	0.565217	0.207793	0.366912	0.700001	0.60274	0.640073	0.604976	0.141689	1.07639
pulse 8	0.768116	0.199135	0.346154	0.657266	0.684336	0.650045	0.576936	0.122616	0.966315
pulse 9	0.644928	0	0.42613	0.625215	0.571173	0.636957	0.616894	0.134423	0.876371
pulse 10	0.775362	0.376624	0.343102	0.768803	0.634306	0.637269	0.596214	0.0699362	0.9457
DS (LR normalized responses)
	cell 1	cell 2	cell 3	cell 4	cell 5	cell 6	cell 7	cell 8	cell 9
pulse 1	1	1	1	1	1	1	1	1	1
pulse 2	1.42683	0.576086	0.481595	1.20476	3.34188	0.554105	1.12995	1.86916	1.31473
pulse 3	2.17684	0.847825	0.499999	1.34214	1.92308	0.568842	1.27575	1.25233	0.915176
pulse 4	1.70732	1.01087	0.53681	1.37913	2.66667	0.528421	0.980983	1.71962	0.785714
pulse 5	2.06708	0.967389	0.527607	1.43857	2.60683	0.538526	0.863709	1.15888	0.995531
pulse 6	1.92073	0.717391	0.561349	1.4399	2.41024	0.545684	0.885894	1.95327	0.941961
pulse 7	2.26219	0.380436	0.73006	1.48481	2.54701	0.571789	0.896986	1.80062	0.886161
pulse 8	1.67073	1.05435	0.558282	1.58917	2.73503	0.515789	0.790809	1.52336	0.995531
pulse 9	2.35976	0.913044	0.604294	1.60634	2.97435	0.503579	0.657686	1.9595	0.776783
pulse 10	2.39634	1.28261	0.720859	1.56407	2.37608	0.51621	0.770203	1.8567	0.857145
CLA (RS normalized responses)
	cell 1	cell 2	cell 3	cell 4	cell 5	cell 6	cell 7	cell 8
pulse 1	1	1	1	1	1	1	1	1
pulse 2	1.04975	1.53595	2.26847	1.32488	0.369411	0.812501	1.11278	1.86487
pulse 3	1.29353	1.05882	1.59709	1.19122	0.489411	0.750001	0.849623	2.75676
pulse 4	0.716418	1.69281	1.9633	1.18439	0.479999	0.916667	1.11278	2.08108
pulse 5	1.0398	1	2.78727	1.02342	0.461176	0.819444	1.02256	2.54054
pulse 6	0.9801	0.934641	2.38037	0.906343	0.37647	0.9375	1.13534	2.48649
pulse 7	0.38806	1.06536	2.22778	0.962927	0.425881	0.930557	0.969925	2.5946
pulse 8	0.721394	1.11111	2.72623	1.02537	0.428234	1.08333	0.969925	3.16217
pulse 9	0.78607	0.986928	2.11588	0.88683	0.53647	0.993055	1.25564	2.37838
pulse 10	0.492538	0.934641	1.91243	0.85561	0.423529	0.805556	1.03008	2.64865
ACC (RS normalized responses)
	cell 1	cell 2	cell 3	cell 4	cell 5	cell 6	cell 7
pulse 1	1	1	1	1	1	1	1
pulse 2	1.21093	1.60099	0.959556	1.13716	1.14518	1.2252	1.63478
pulse 3	0.0689605	1.67981	1.24901	1.26622	1.46268	1.21732	1.4087
pulse 4	0.090575	1.85715	1.24029	1.48581	1.43419	1.1874	1.81739
pulse 5	0.134319	2.2808	1.31721	1.45878	1.59294	1.17165	1.32174
pulse 6	0.135863	1.92119	1.52498	1.79797	1.65264	1.05827	1.18261
pulse 7	0.16005	2.21183	1.48533	1.76621	1.67707	1.07086	0.698101
pulse 8	0.169828	1.98523	1.70341	2.02567	1.69742	1.1748	1.52174
pulse 9	0.167255	2.32021	1.48453	1.70946	1.65264	1.05984	1.26087
pulse 10	0.166226	2.40887	1.49802	1.83581	1.83582	1.05669	1.64348
